# Supplementary material for: A self-assembling conjugate of SN38 with aminoguanidine for simultaneously suppressing proliferation and migration of breast cancer cells
Source: Royal Society of Chemistry journal article supplement (doi:10.1039/d4nj02778g), 2024-01-01
Supplement: d4nj02778g1.pdf [file d4nj02778g1.pdf]

## Electronic Supporting Information

for

# Self-assembling Conjugate of SN38 with Aminoguanidine for Simultaneous Suppression of Breast Cancer Cell Growth and Migration.

Yi Dai<sup>1</sup>, Yang Zhang<sup>2</sup>, Yupei Zhang<sup>1</sup>, Jiamiao Wang<sup>1</sup>

<sup>1</sup>College of Pharmaceutical Science, Anhui Xinhua University, Hefei 230088, China

<sup>2</sup>The first affiliated hospital of University of Science and Technology of China, Hefei, 230031, China

Correspondence should be addressed to Yi Dai; daiyiii@163.com

## Contents

|                                                                                                                                             |   |
|---------------------------------------------------------------------------------------------------------------------------------------------|---|
| <b>Scheme S1.</b> The structure of nitric oxide donor.....                                                                                  | 2 |
| <b>Synthesis of compound 1</b> .....                                                                                                        | 2 |
| <b>Scheme S2.</b> Synthetic route of compound <b>1</b> .....                                                                                | 2 |
| <b>Figure S1.</b> <sup>1</sup> H NMR spectrum of compound <b>1</b> .....                                                                    | 2 |
| <b>Figure S2.</b> <sup>1</sup> H NMR spectrum of compound <b>2</b> .....                                                                    | 3 |
| <b>Figure S3.</b> <sup>1</sup> H NMR spectrum of compound <b>4</b> .....                                                                    | 3 |
| <b>Figure S4.</b> <sup>1</sup> H NMR spectrum of compound <b>5</b> .....                                                                    | 4 |
| <b>Figure S5.</b> <sup>13</sup> C NMR spectrum of compound <b>5</b> .....                                                                   | 4 |
| <b>Figure S6.</b> ESI-MS spectrum of compound <b>5</b> .....                                                                                | 5 |
| <b>Figure S7.</b> <sup>1</sup> H NMR spectrum of compound <b>6</b> .....                                                                    | 5 |
| <b>Figure S8.</b> <sup>13</sup> C NMR spectrum of compound <b>6</b> .....                                                                   | 6 |
| <b>Figure S9.</b> ESI-MS spectrum of compound <b>6</b> .....                                                                                | 6 |
| <b>Figure S10.</b> ESI-HRMS spectrum of compound <b>6</b> .....                                                                             | 7 |
| <b>Figure S11.</b> The effect of SN38 on migration of cancer cells measured using scratch test. ....                                        | 7 |
| <b>Figure S12.</b> The effect of pretreatment of NO donor on migration of cancer cells treated with compound <b>6</b> via scratch test..... | 8 |

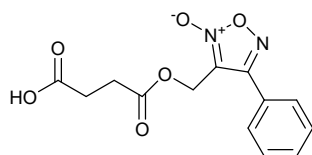

**Scheme S1.** The structure of nitric oxide donor

**Synthesis of compound 1:** firstly, 1,3-diazido-2-(azidomethyl) propan-2-amine was synthesized as described in the literatures. Then 1,3-diazido-2-(azidomethyl) propan-2-amine (3.14 g, 16 mmol) and succinic anhydride (1.6 g, 16 mmol) was dissolved in 50 mL  $\text{CH}_2\text{Cl}_2$  and stirred over night at room temperature. Then the reaction solution was washed with water three times and dried with anhydrous sodium sulfate. After removal of  $\text{CH}_2\text{Cl}_2$  in vacuum, compound 1, a white solid, was obtained with the yield of 91%.  $^1\text{H-NMR}$  (300 MHz, Chloroform-*d*)  $\delta$  5.91 (s, 1H), 3.70 (s, 6H), 2.71 (t,  $J=6.6\text{Hz}$ , 2H), 2.52 (t,  $J=6.6\text{Hz}$ , 2H).

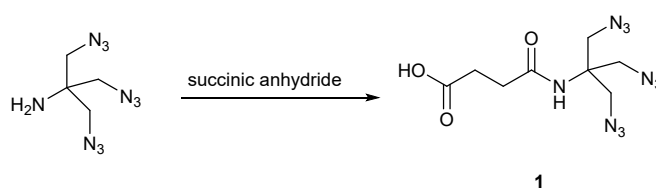

**Scheme S2.** Synthetic route of compound 1

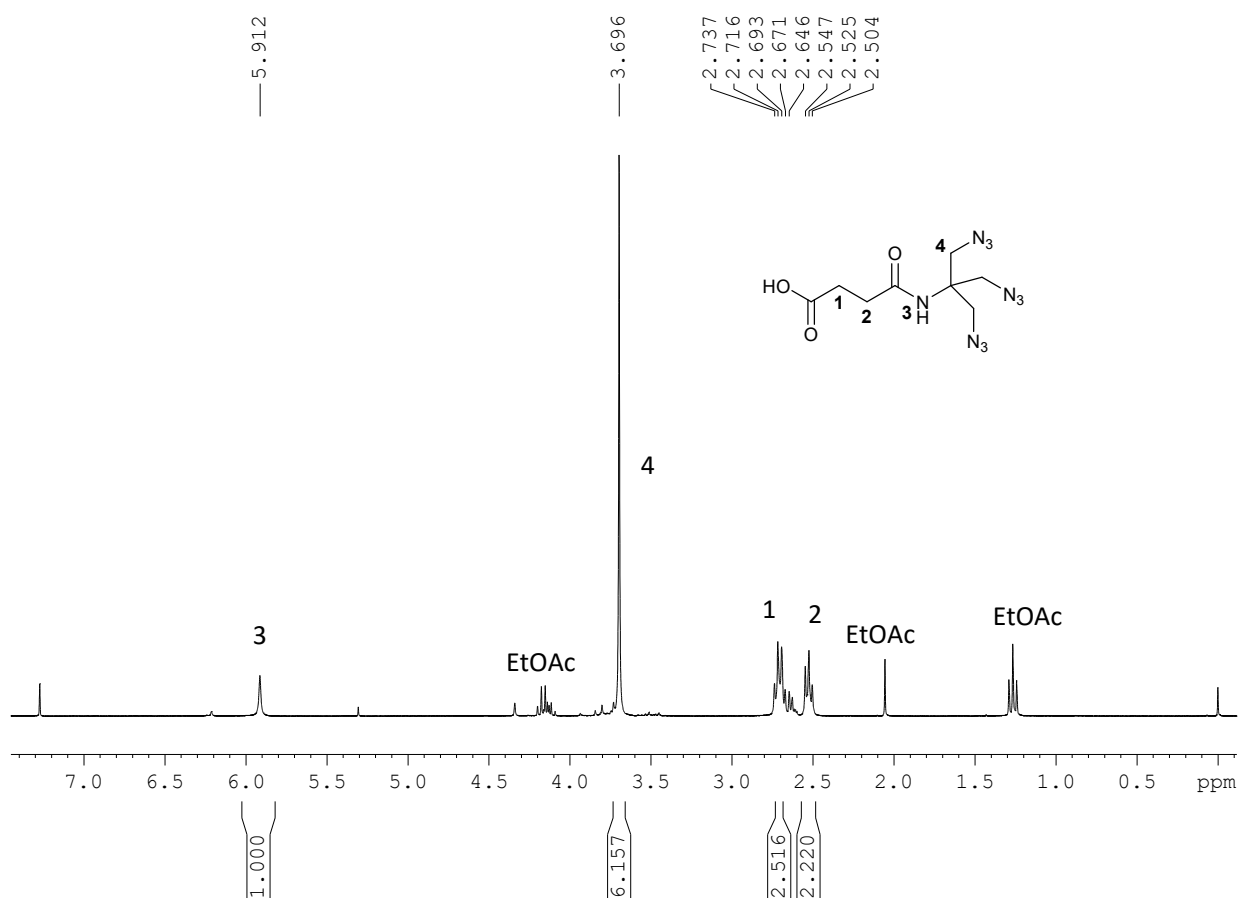

**Figure S1.**  $^1\text{H NMR}$  spectrum of compound 1 (300 MHz, Chloroform-*d*)

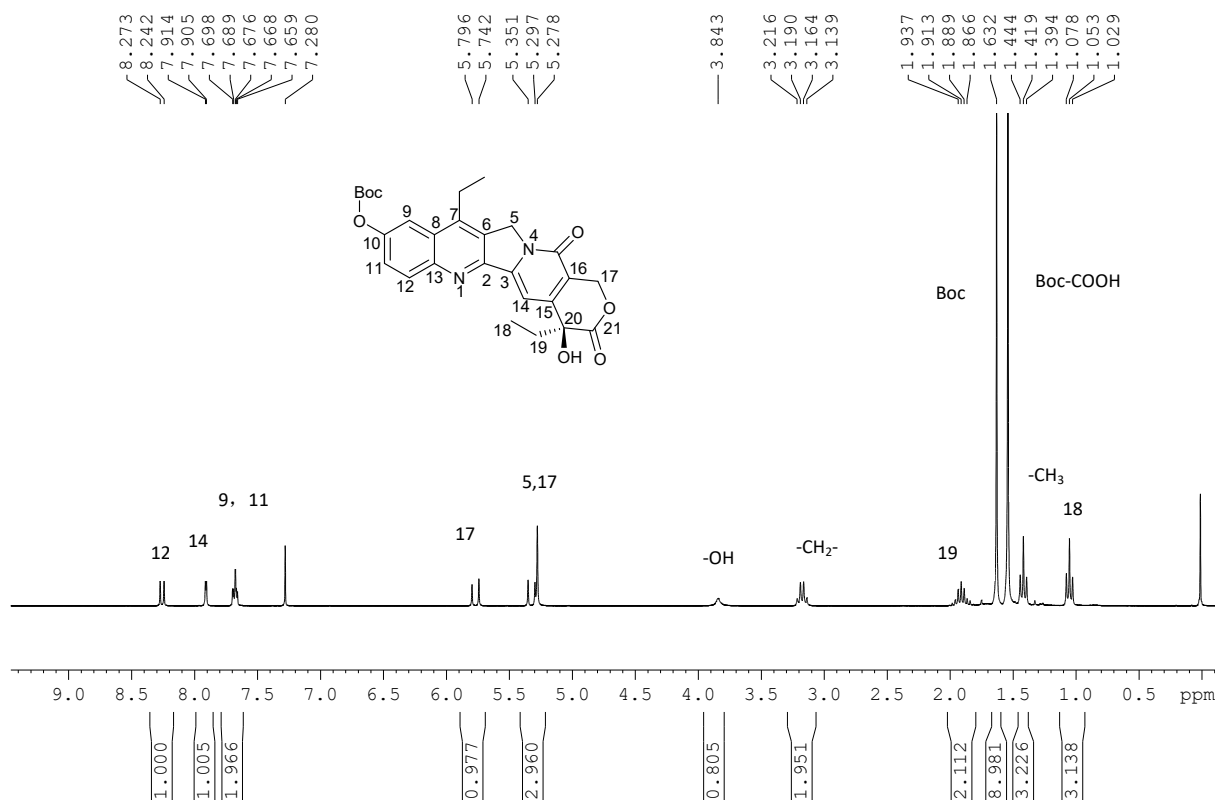

**Figure S2.** <sup>1</sup>H NMR spectrum of compound 2 (300 MHz, Chloroform-*d*)

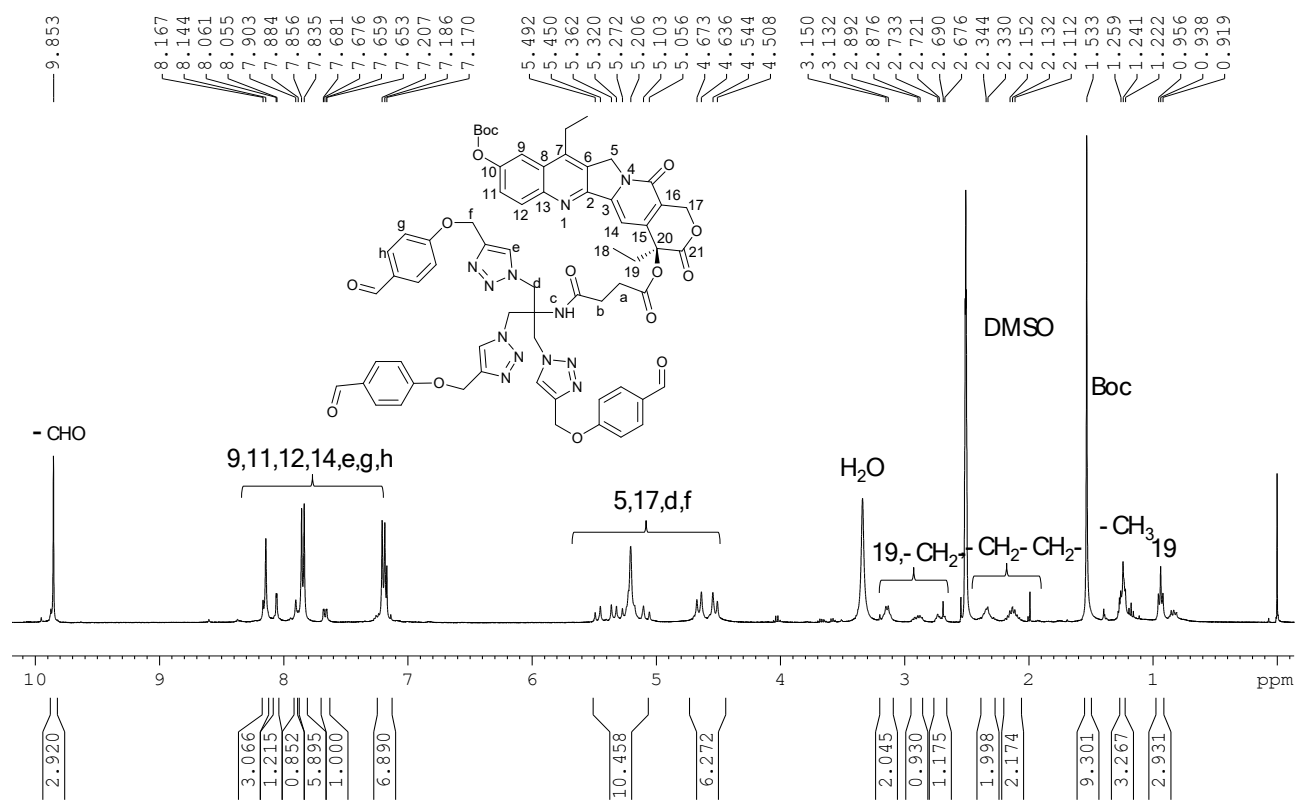

**Figure S3.** <sup>1</sup>H NMR spectrum of compound 4 (400 MHz, DMSO-*d*<sub>6</sub>)

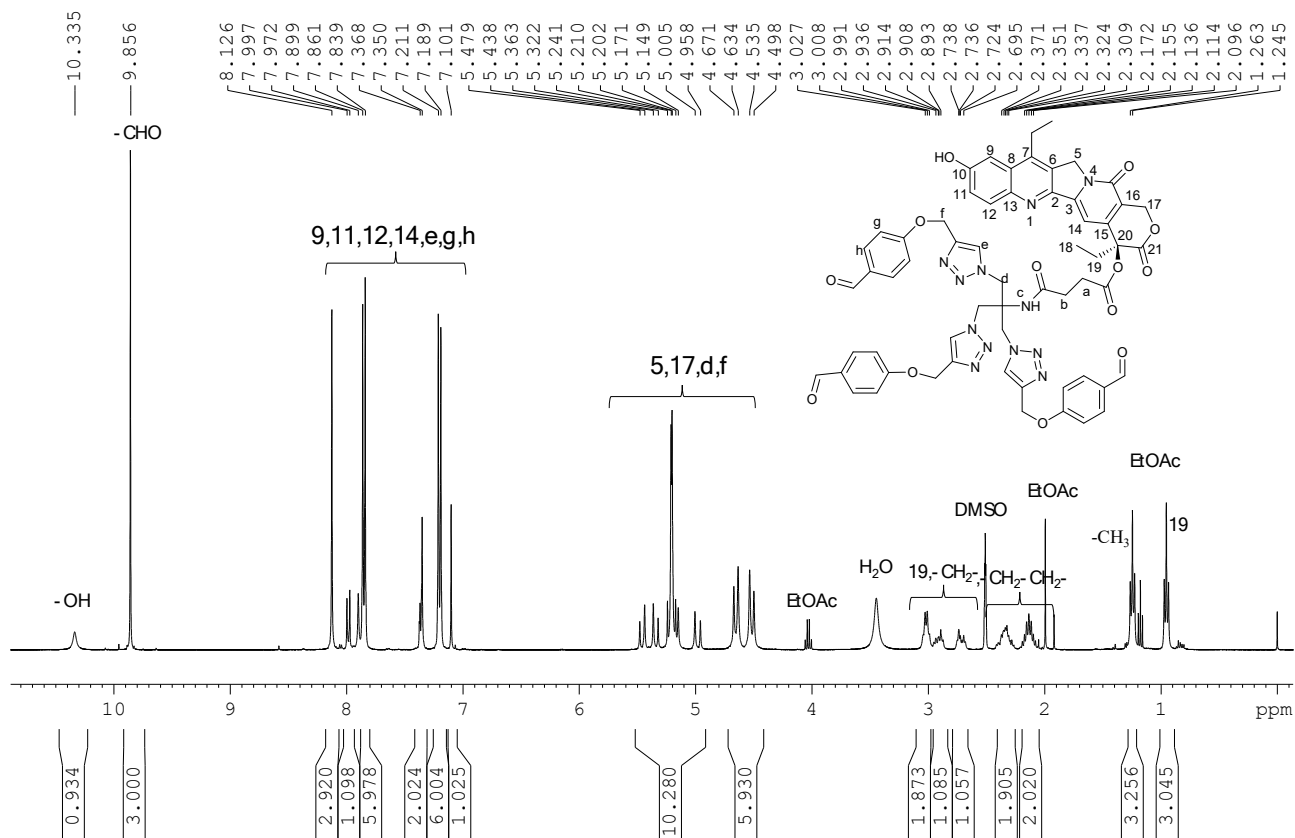

**Figure S4.** <sup>1</sup>H NMR spectrum of compound 5 (400 MHz, DMSO-*d*<sub>6</sub>)

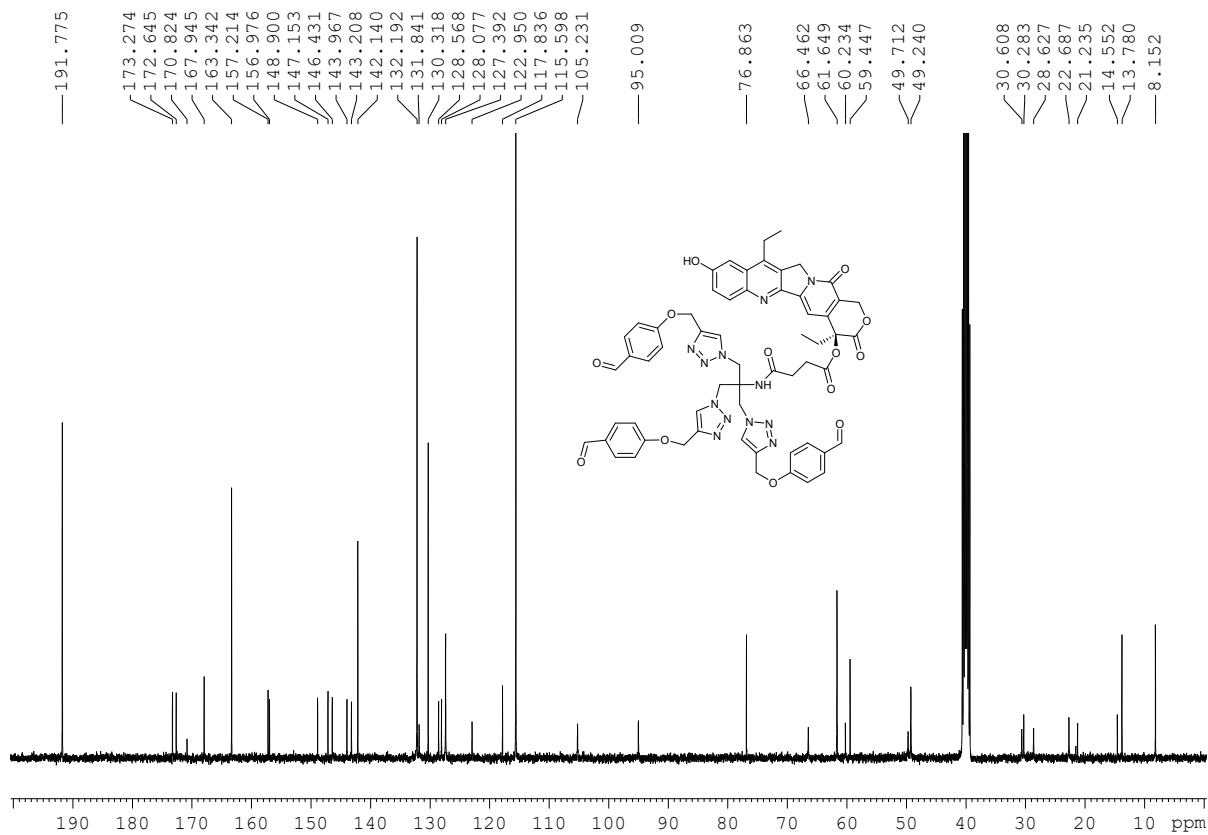

**Figure S5.** <sup>13</sup>C NMR spectrum of compound 5 (101 MHz, DMSO-*d*<sub>6</sub>)

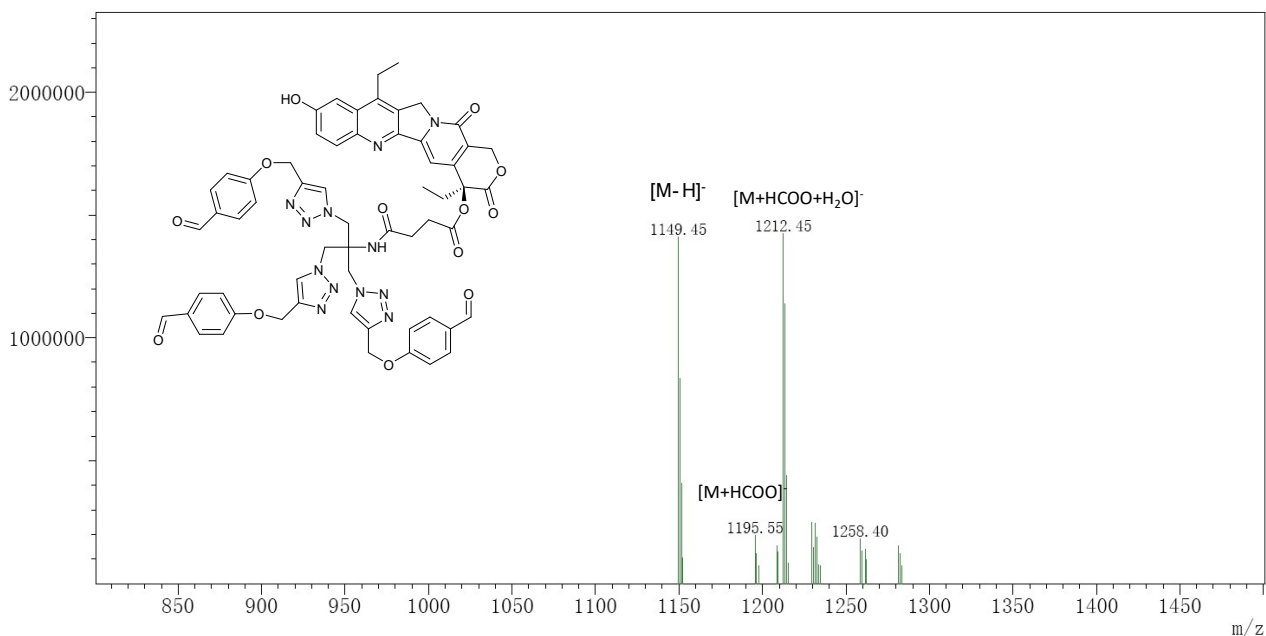

**Figure S6.** ESI-MS spectrum of compound **5**

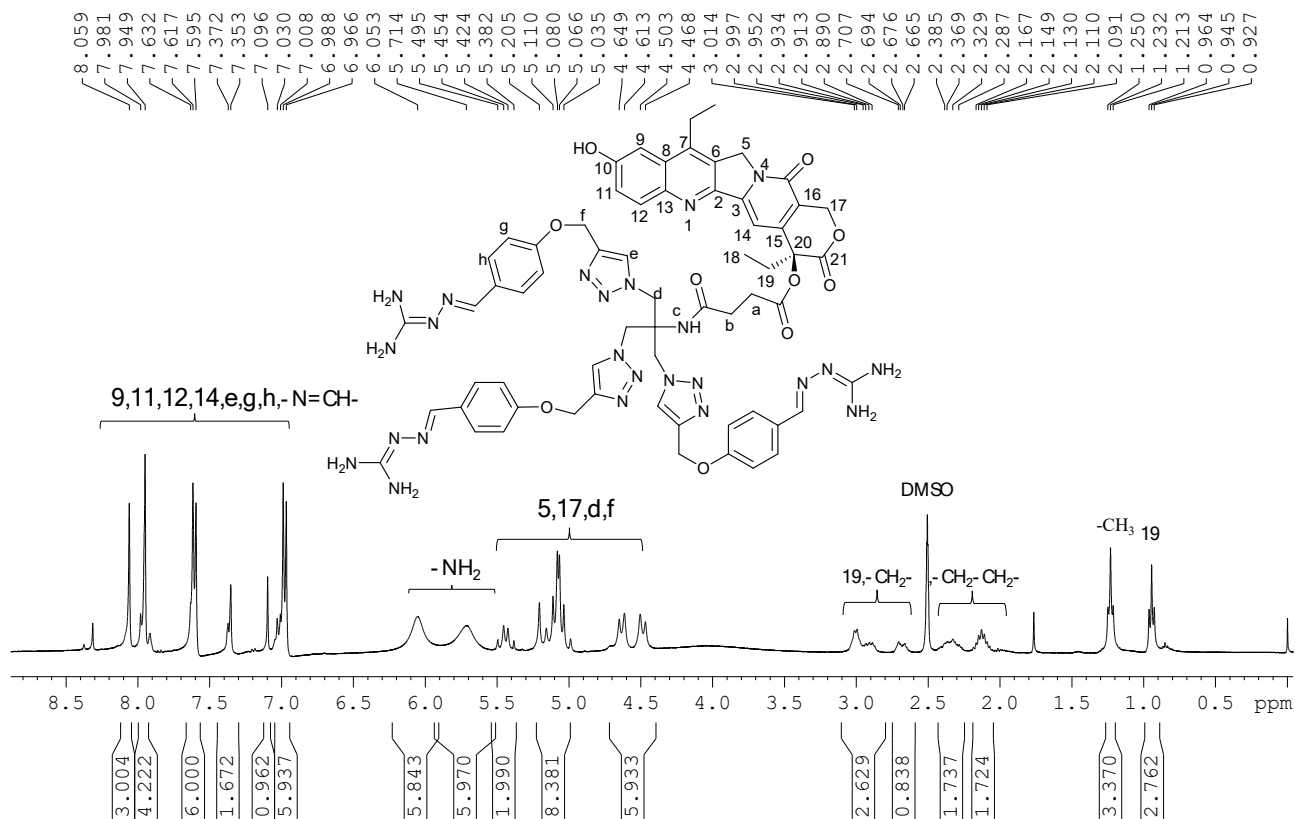

**Figure S7.**  $^1\text{H}$  NMR spectrum of compound **6** (400 MHz,  $\text{DMSO}-d_6$ )

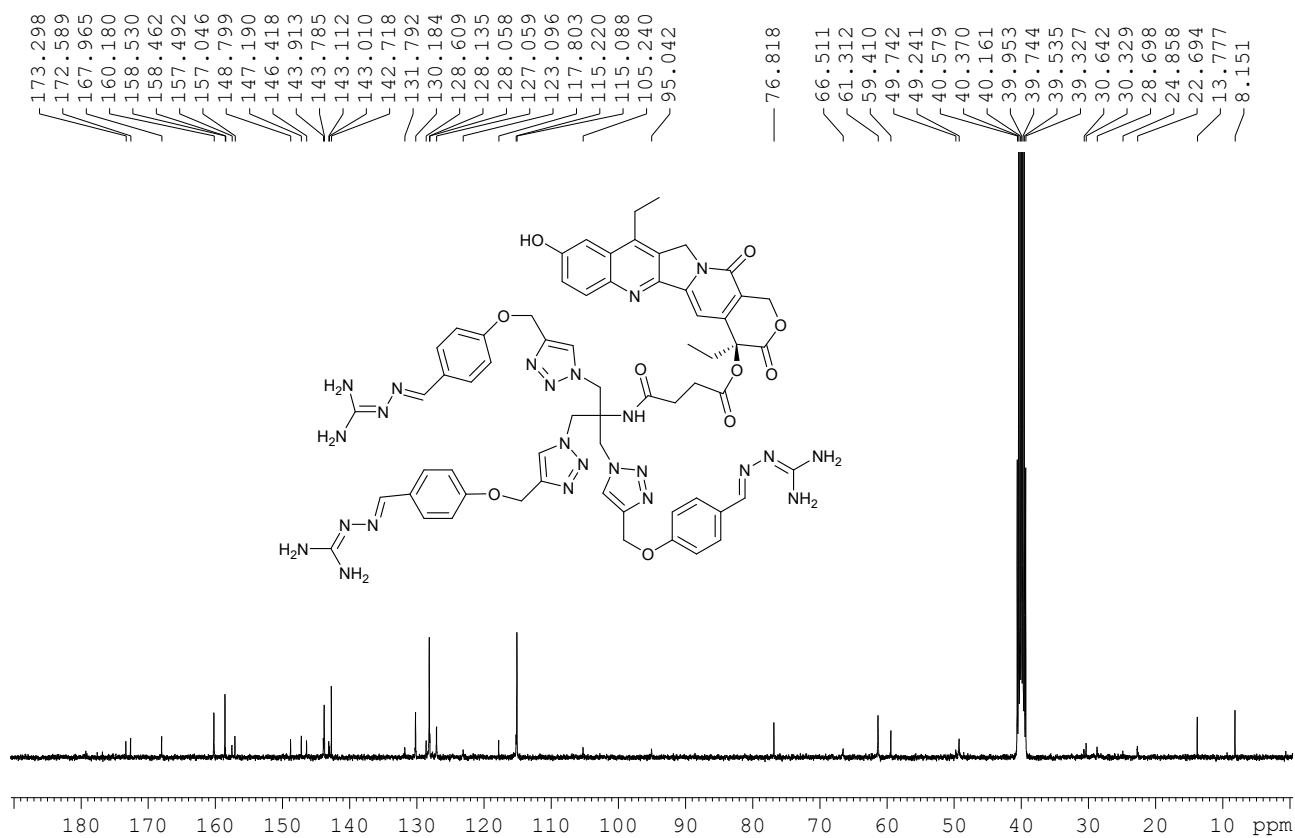

**Figure S8.**  $^{13}\text{C}$  NMR spectrum of compound 6 (101MHz,  $\text{DMSO-}d_6$ )

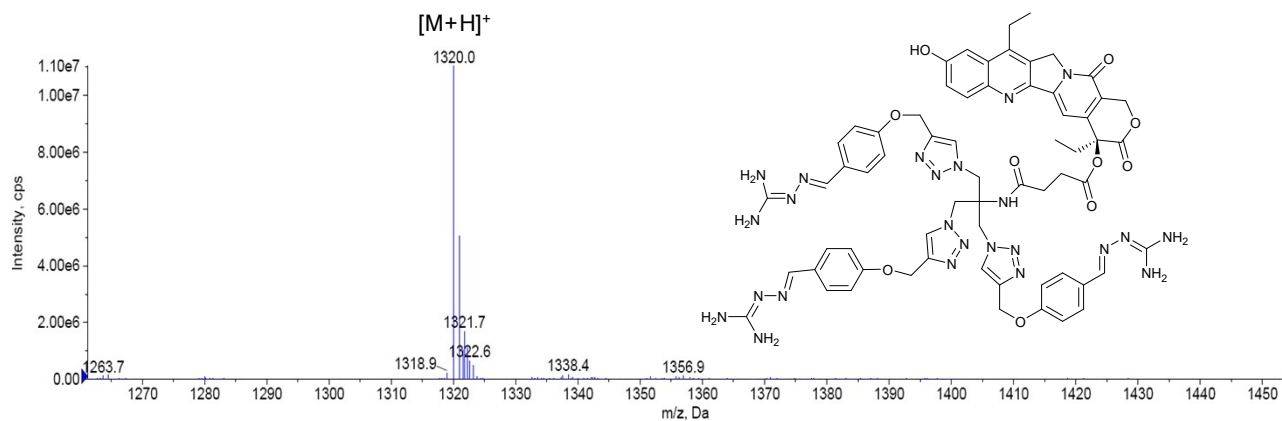

**Figure S9.** ESI-MS spectrum of compound 6

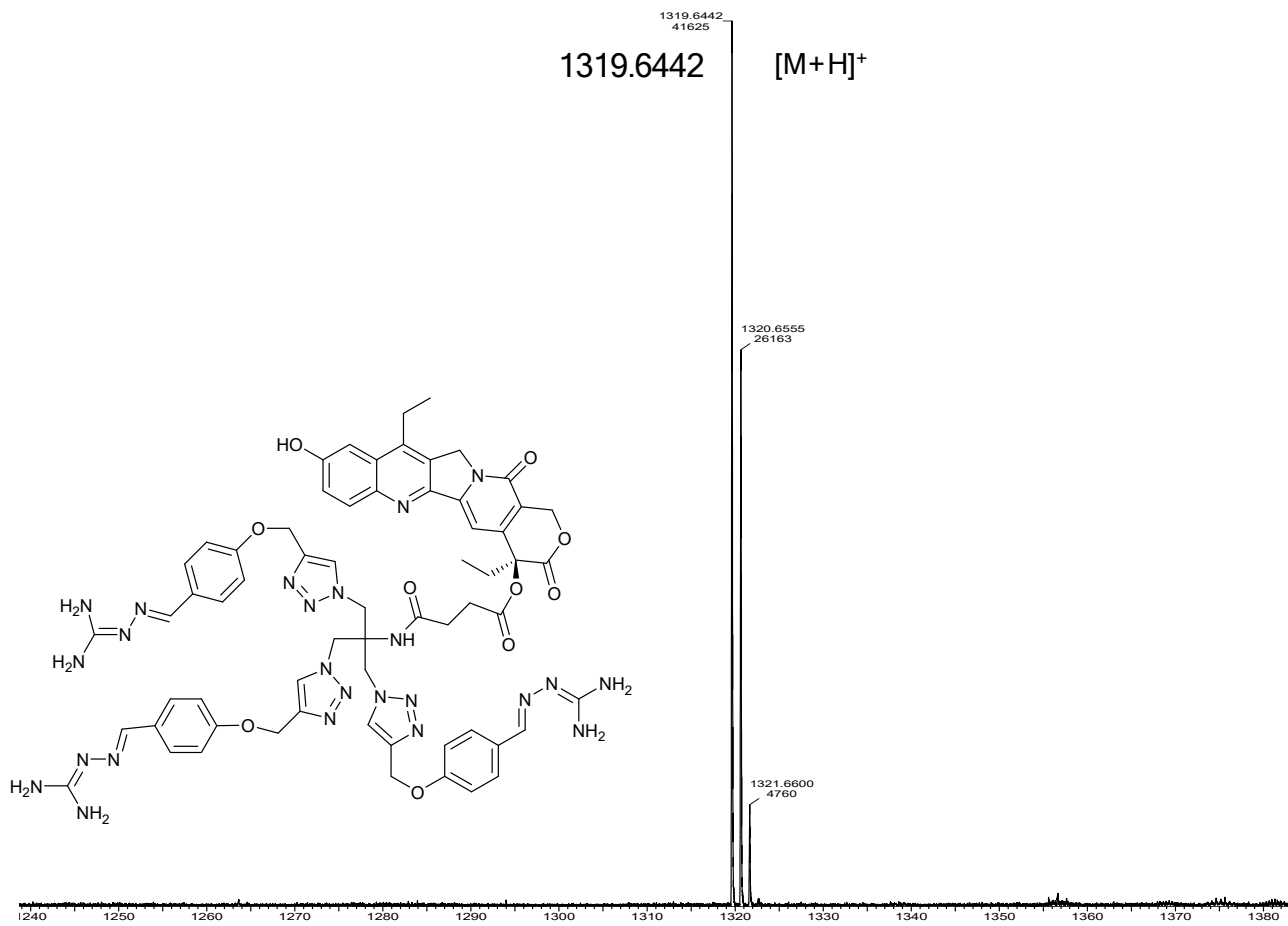

**Figure S10.** ESI-HRMS spectrum of compound **6**

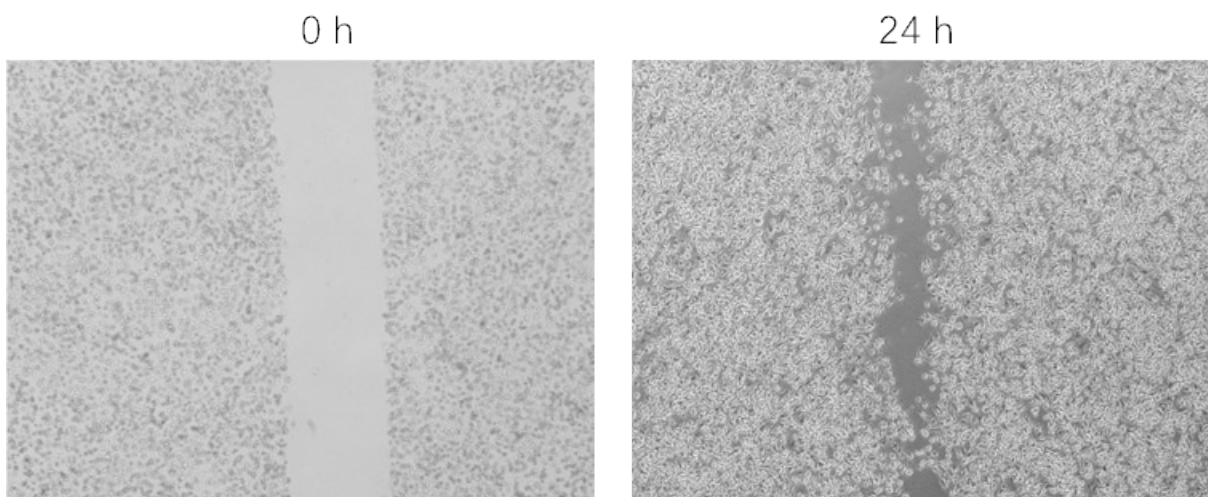

**Figure S11.** The effect of SN38 on migration of cancer cells measured using scratch test. MDA-MB-231 cells were pre-incubated for 24 h with drugs at dose of 0.5  $\mu$ M. Analyses of lateral migratory cells were obtained by measuring wound closure rate.

Compound **6**, Nitric oxide donors (-)

A

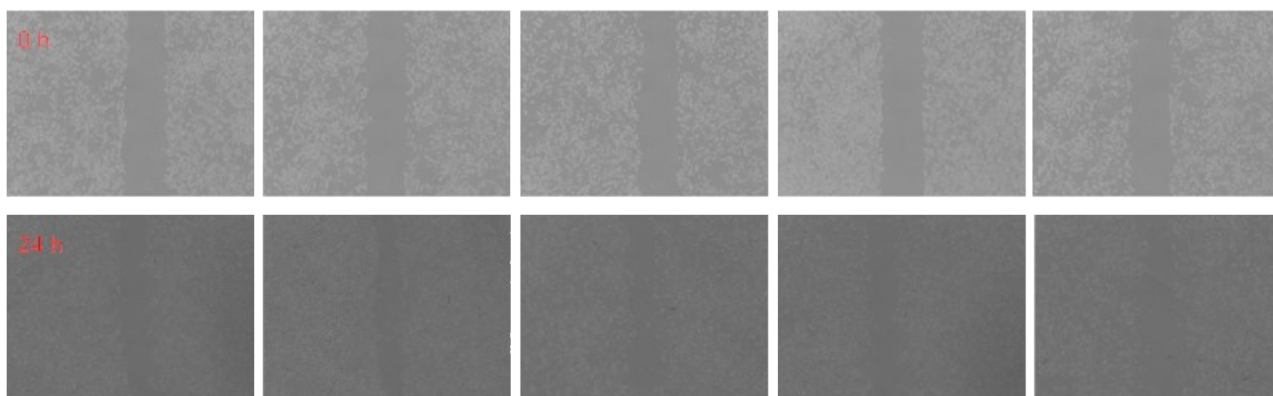

Compound **6**, Nitric oxide donors (0.5  $\mu$ M)

B

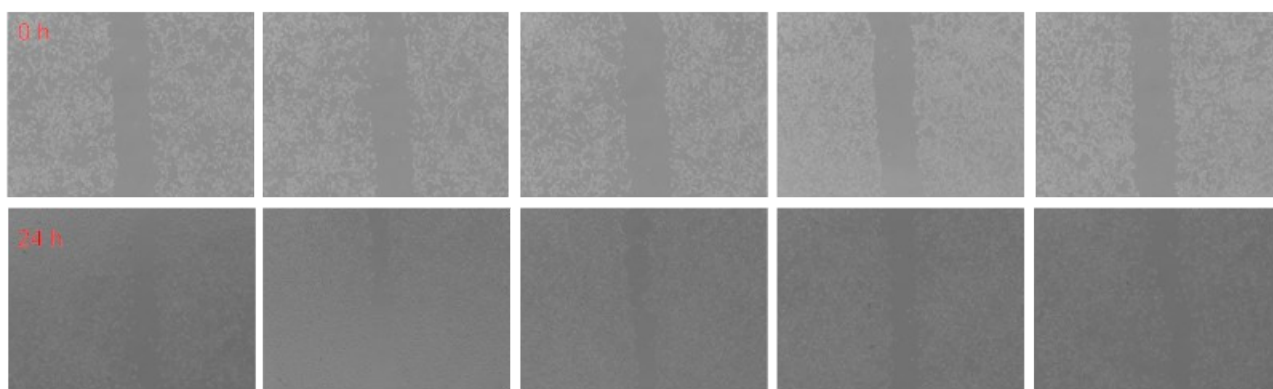

Compound **6**, Nitric oxide donors (1.0  $\mu$ M)

C

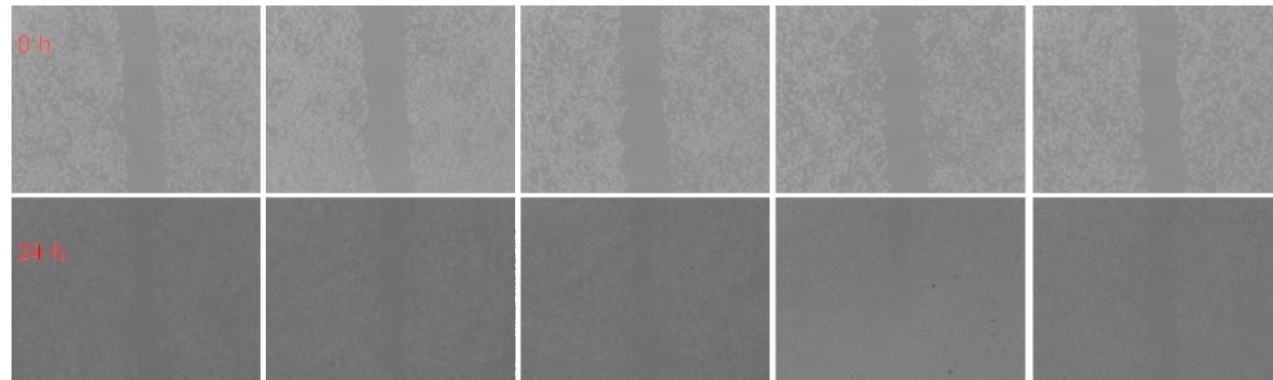

**Figure S12.** The effect of pretreatment of NO donor on migration of cancer cells treated with compound **6** via scratch test. MDA-MB-231 cells were pretreated for 1 h with NO donor and co-incubated with compound **6** at dose of 1  $\mu$ M. The wound healing rate were assayed. Compound **6** was administered in the form of nanoparticles.
